# Supplementary material
Source: publisher figshare collection journal article supplement (https://frontiersin.figshare.com/ndownloader/files/16195478)
Supplement: Supplementary file [file 16195478]

## Supplementary Material

### Formation of monolithic ion-selective transport media in pre-formed microfluidic channels

Tobias Abrahamsson<sup>1</sup>, David J. Poxson<sup>1</sup>, Erik O. Gabrielsson<sup>1</sup>, Mats Sandberg<sup>2</sup>, Daniel T. Simon<sup>1\*</sup>, Magnus Berggren<sup>1</sup>

Laboratory of Organic Electronics, Department of Science and Technology, Linköping University, 601 74 Norrköping, Sweden

<sup>2</sup>RISE Acreo AB, 601 17 Norrköping, Sweden

\* Correspondence: [daniel.simon@liu.se](mailto:daniel.simon@liu.se)

#### 1 Supplementary Data

<sup>1</sup>H-, <sup>13</sup>C- & <sup>31</sup>P-NMR characterization and degree of substitution calculation.

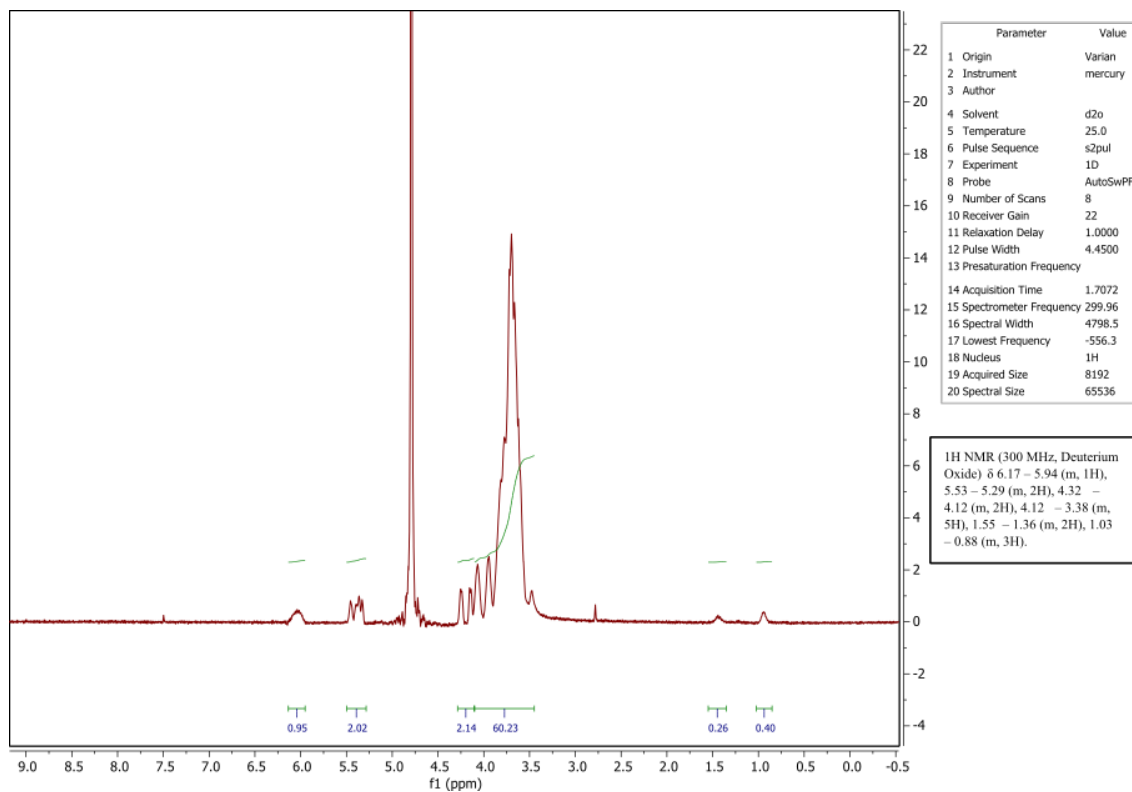

Figure S1a.  $^1\text{H}$ -NMR (300 MHz, Deuterium Oxide) - Allyl-HPG5 (compound 2).

$$DS (\%) \text{ Allyl} = \left( \frac{\frac{2.02}{60.23}}{\frac{2}{5}} \right) \times 100 \approx 10 \%$$

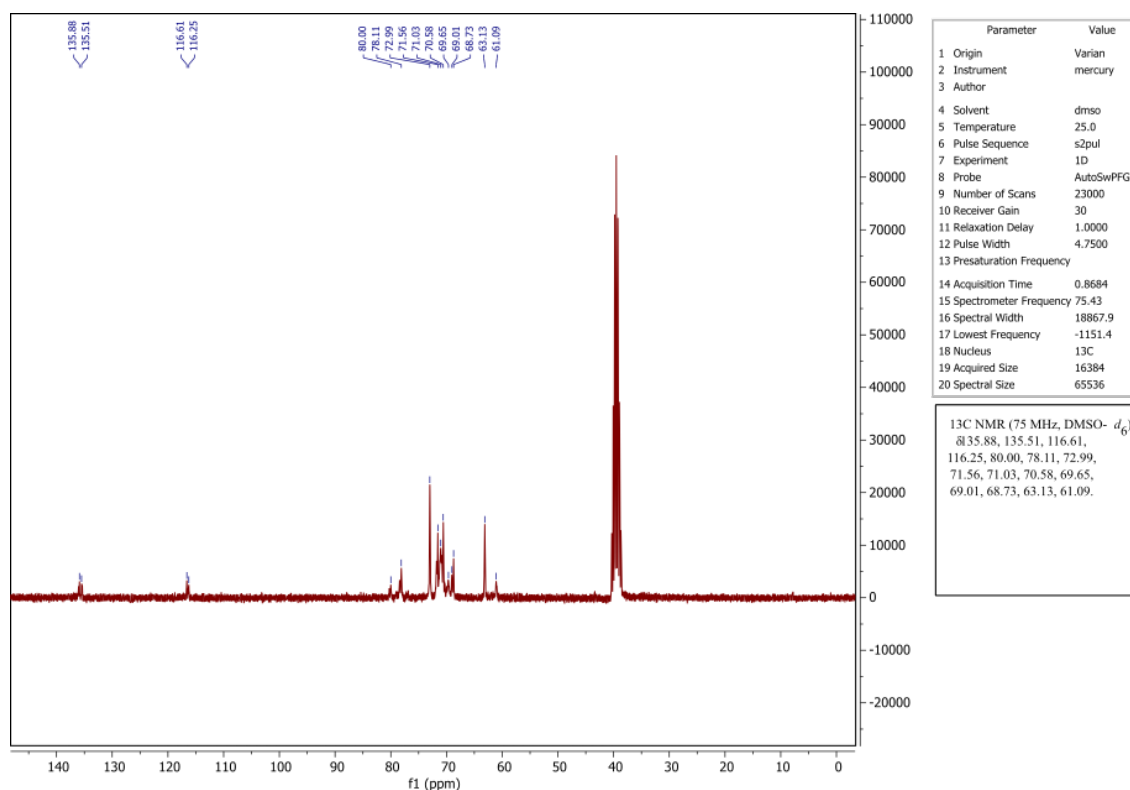Figure S1b.  $^{13}\text{C}$ -NMR (75 MHz,  $\text{DMSO}-d_6$ ) – Allyl-HPG5 (compound 2).

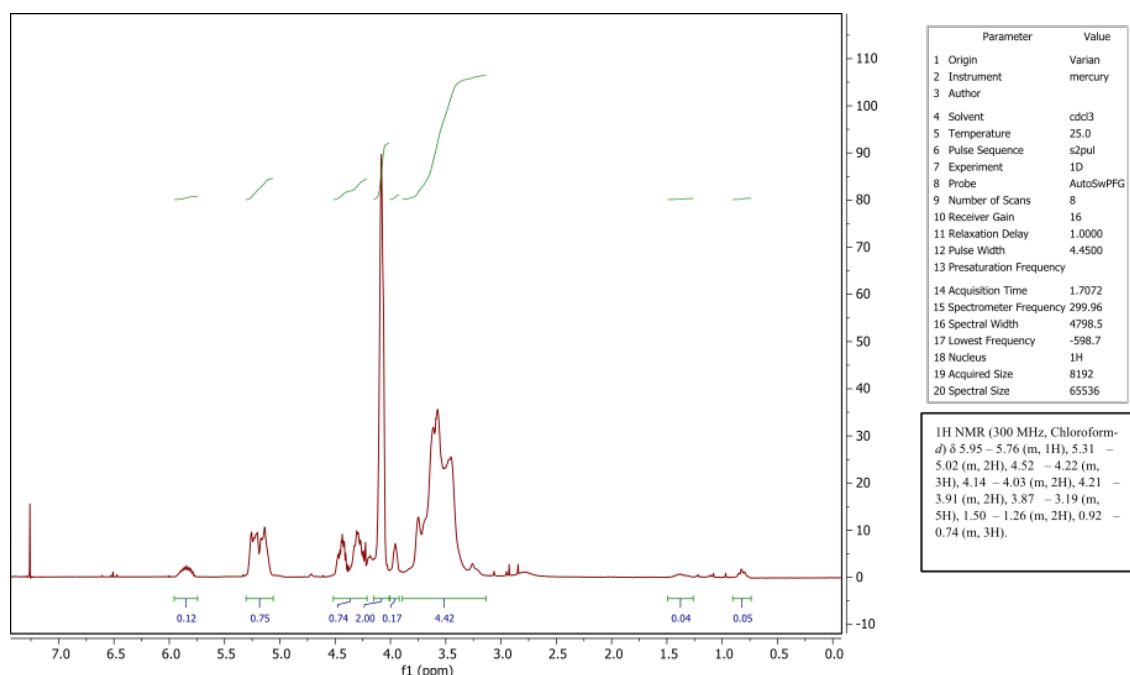

Figure S2a.  $^1\text{H}$ -NMR (300 MHz, Chloroform-*d*) – Chloroacetate-allyl-HPG5 (compound 3).

$$DS (\%)_{\text{Chloroacetate}} = \left( \frac{\frac{2}{4.42 + 0.17 + 0.74 + 0.75 + 0.12}}{\frac{2}{5 + 5 * 0.1}} \right) \times 100 \approx 90 \%$$

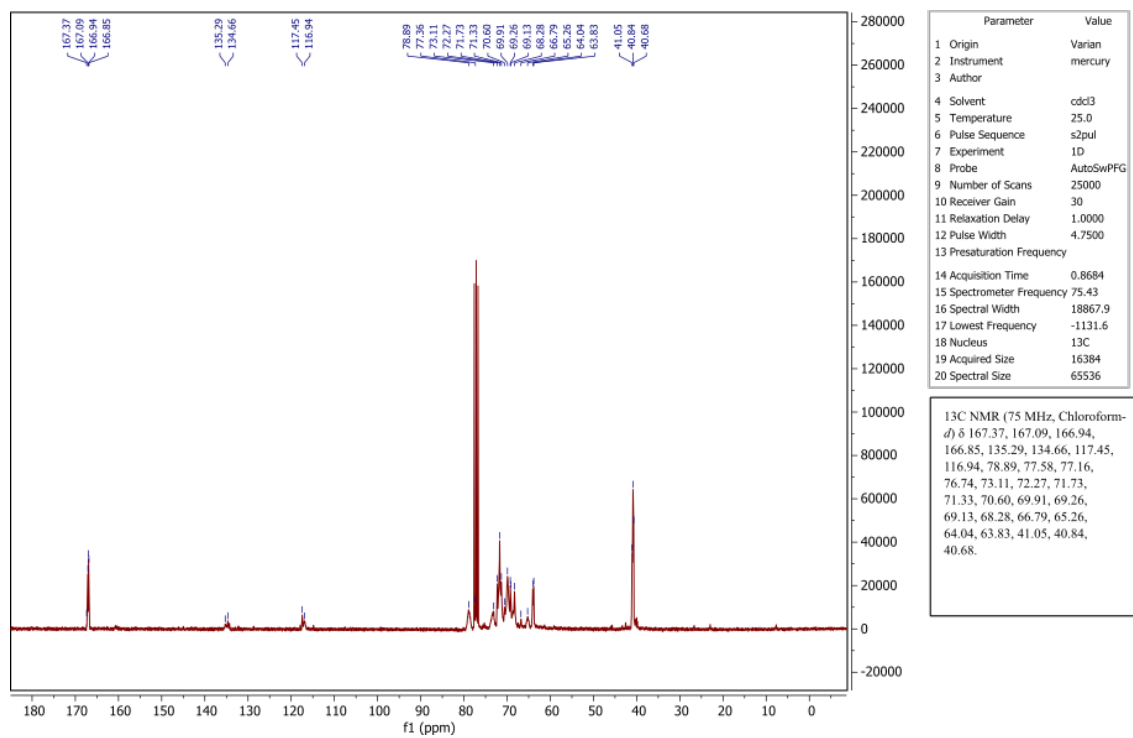

Figure S2b.  $^{13}\text{C}$ -NMR (75 MHz, Chloroform-*d*) - Chloroacetate-allyl-HPG5 (compound 3).

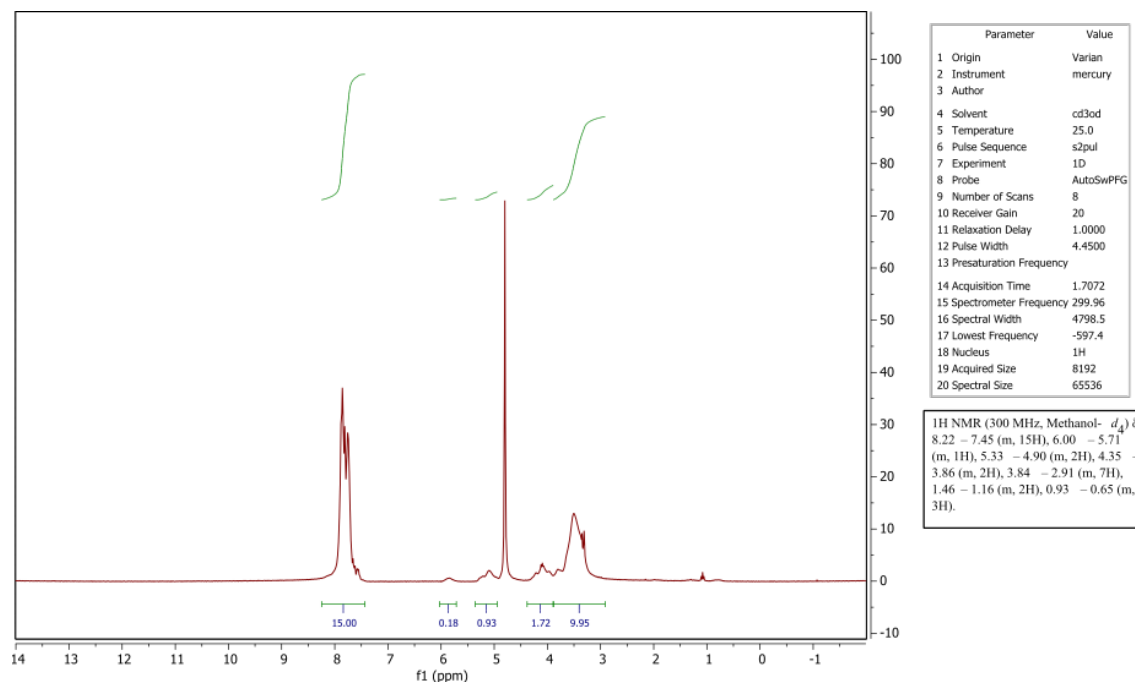

Figure S3a.  $^1\text{H}$  NMR (300 MHz, Methanol- $d_4$ ) – C-HPG5 (compound 4).

$$DS (\%)_{\text{Triphenylphosphonium}} = \left( \frac{\frac{15}{9.95 + 1.72 + 0.93 + 0.18}}{\frac{15}{5 + 5 * 0.1 + 2 * 0.9}} \right) \times 100 \approx 60 \%$$

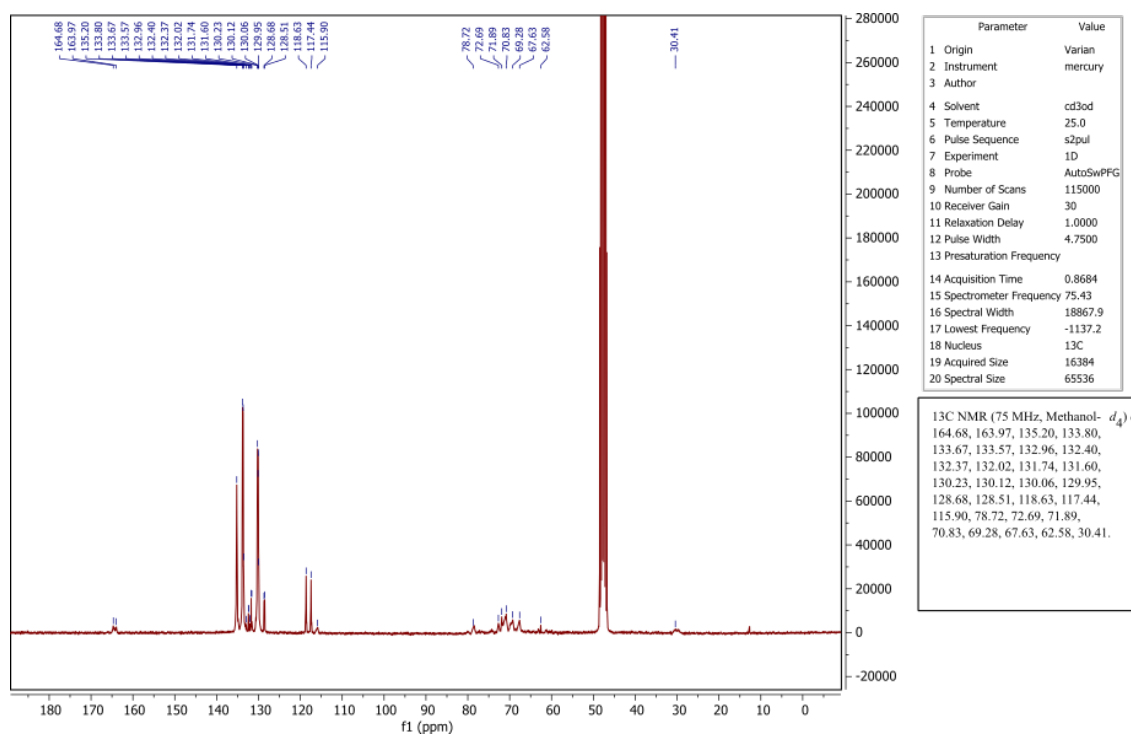Figure S3b.  $^{13}\text{C}$  NMR (75 MHz, Methanol- $d_4$ ) – C-HPG5 (compound 4).

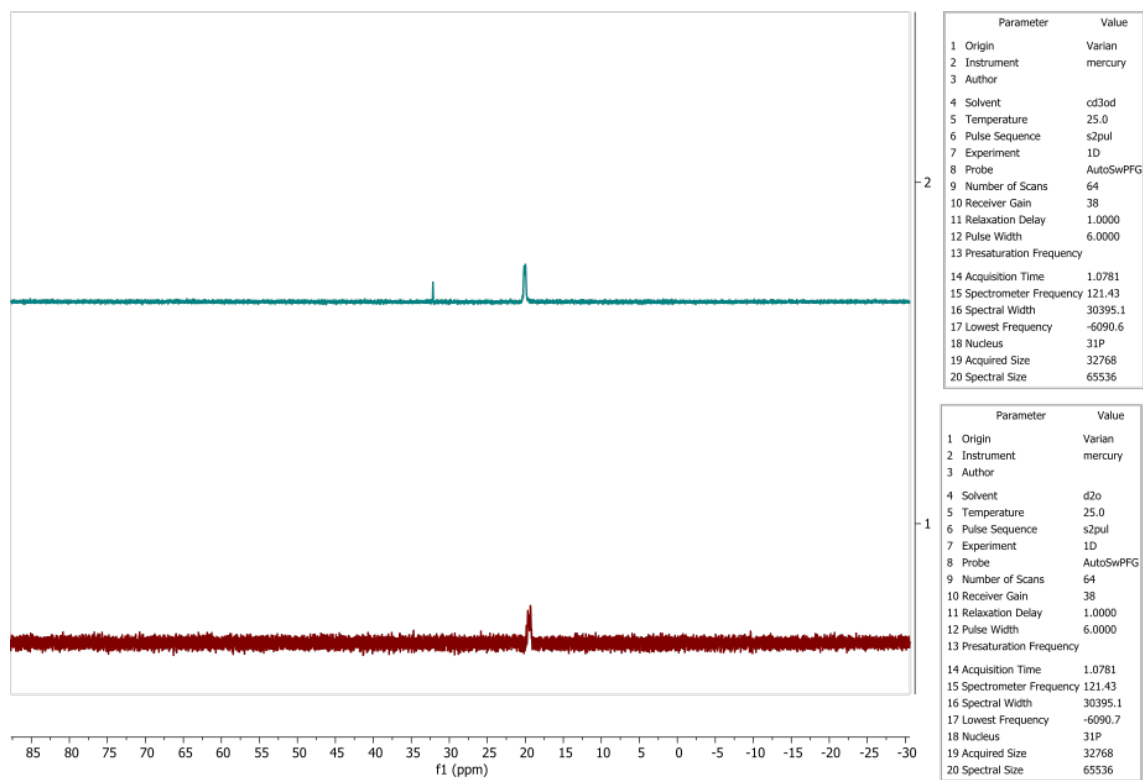

Figure S3c.  $^{31}\text{P}$  NMR (121 MHz, Top: Methanol- $d_4$ , Bottom: Deuterium Oxide) – C-HPG5 (compound 4).

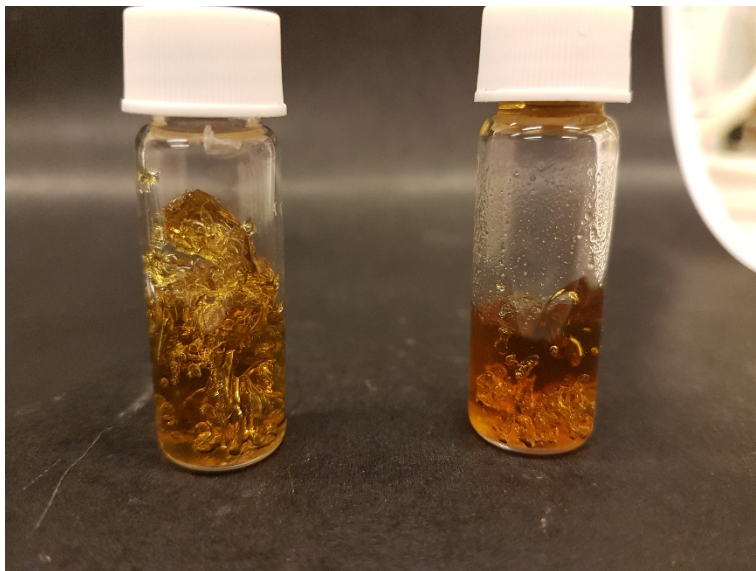

Figure S4. Thermal polymerization gelling at 70°C with C-HPG5, Thiocure ETTMP 1300, TATAO and AIBN. (Left) In methanol and (Right) in 1-propanol.



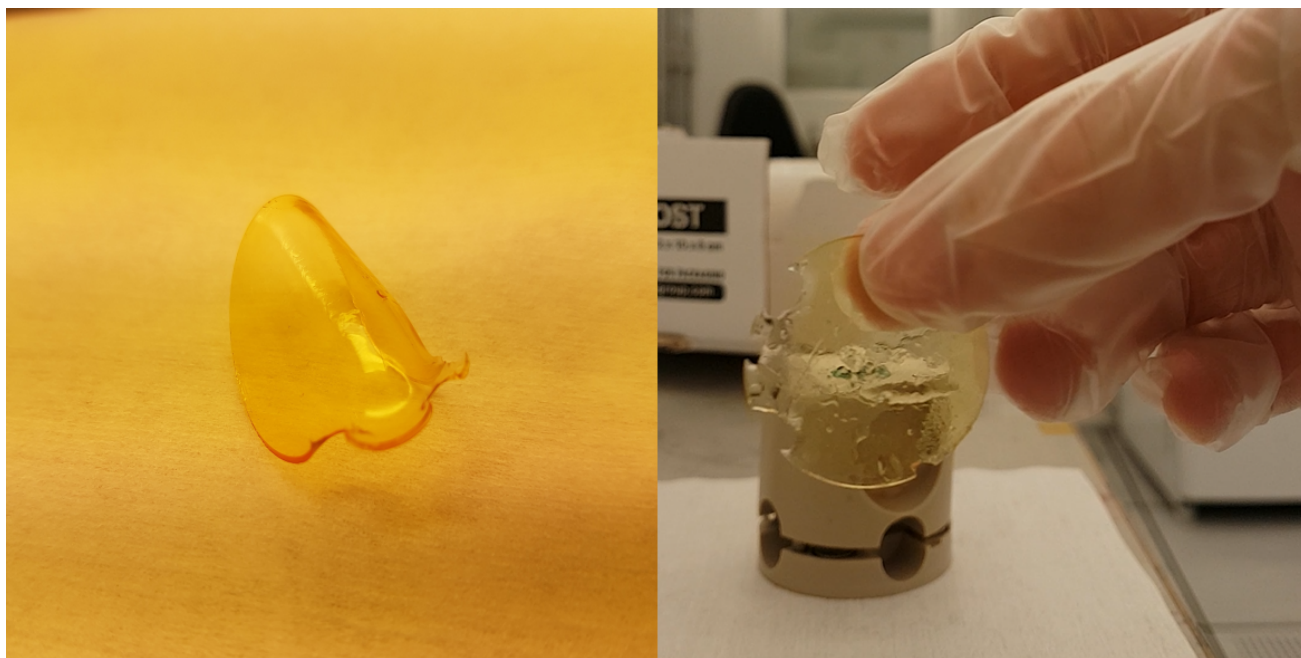

Figure 5. Left: Transparent cross-linked C-HPG5 membrane with flexibility. Right: Water swelling resulting in a more rigid membrane.

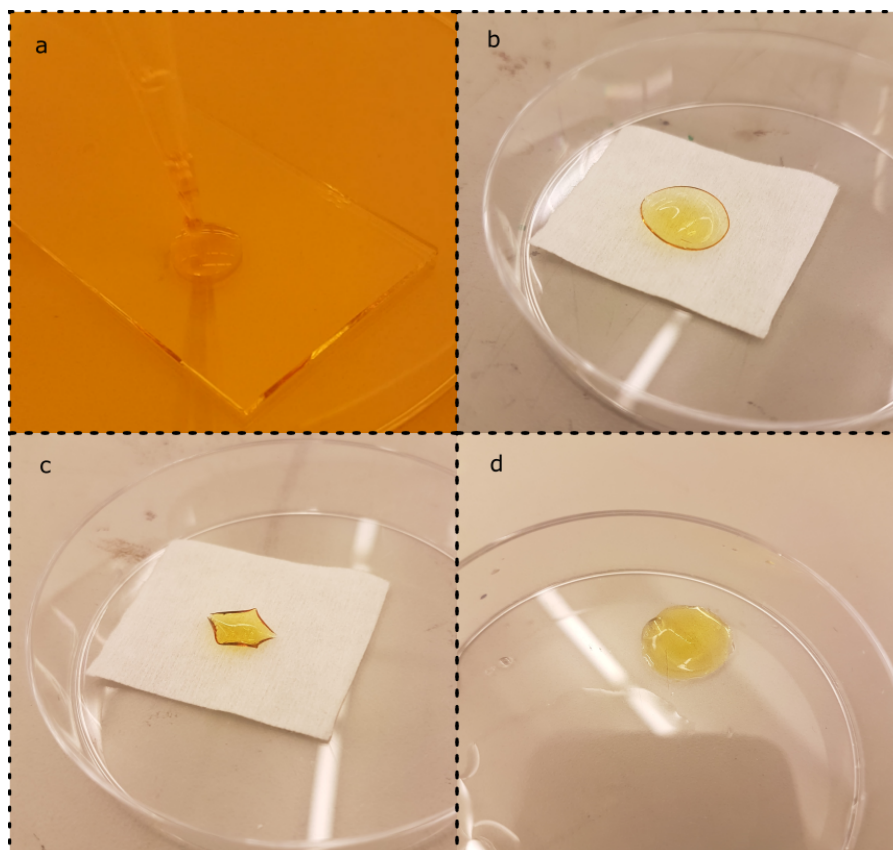

Figure S6. (a) Photo-initiated C-HPG5 methanol/water solution (Table 2. UVC4) drop-casted on glass substrate. (b) Cross-linked hydrated membrane peeled off from the surface (c) and dried in oven. (d) Rehydrated membrane in water.

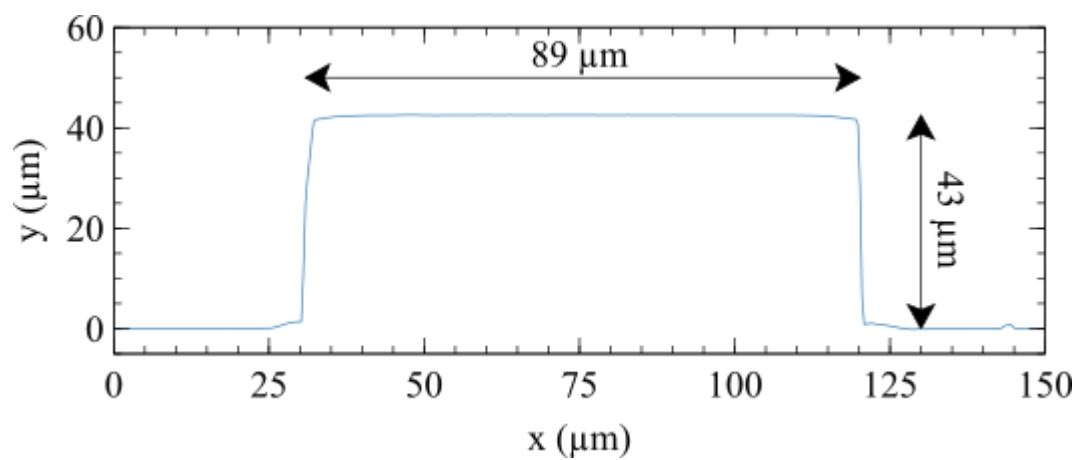

Figure S7. Channel Profile – 8 mm length channel. Optical profilometer (Sensofar PLu Neox) using a 50x confocal objective.

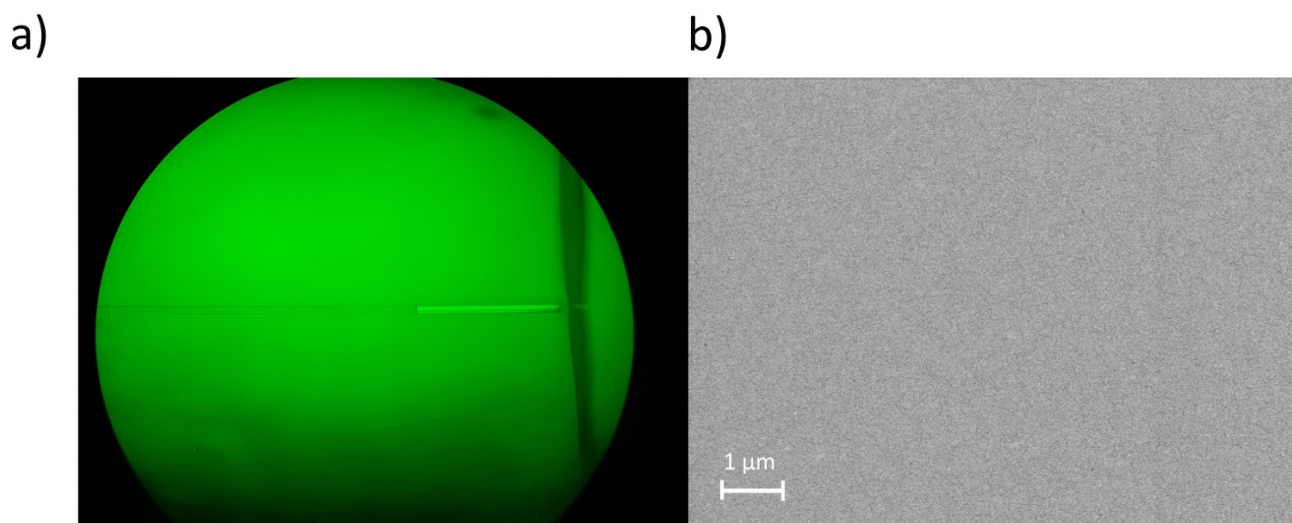

Figure S8. a) Capillary filling process of C-HPG5 monitored by microscopy. b) Scanning electron microscopy image of a fabricated, non-encapsulated C-HPG5 capillary channel.

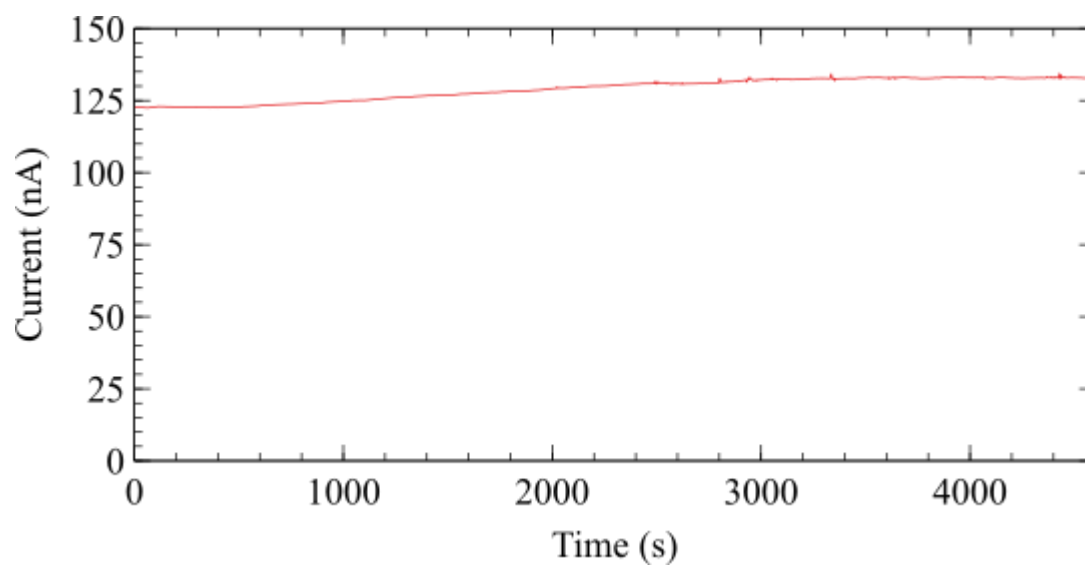

Figure S9. C-HPG5 microchannel in 0.1 M NaCl, applying 1 V.
